# Supplementary material for: Ant-nest-like Cu2−xSe@C with biomimetic channels boosts the cycling performance for lithium storage
Source: Royal Society of Chemistry journal article supplement (doi:10.1039/d1dt01061a), 2021-01-01
Supplement: d1dt01061a1.pdf [file d1dt01061a1.pdf]

**Supporting information**

**Ant-nest-like Cu<sub>2-x</sub>Se@C with biomimetic channels boosts cycling performance of lithium storage**

Wanshu Luo,<sup>1</sup> Meng Cao,<sup>1</sup> Hanqing Pan,<sup>1</sup> Qingqing Wang,<sup>1</sup> Yinglan Ma,<sup>1</sup> Chao Wang,<sup>1</sup> Ying Wang,<sup>1\*</sup> Yingqiu Gu,<sup>1\*</sup> Lei Zhang<sup>2\*</sup>

*<sup>1</sup>School of Chemistry & Materials Science, Jiangsu Key Laboratory of Green Synthetic Chemistry for Functional Materials, Jiangsu Normal University, Xuzhou, Jiangsu 221116, China. E-mail: yingwang@jsnu.edu.cn*

*<sup>2</sup>Centre for Clean Environment and Energy, Gold Coast Campus, Griffith University, Queensland 4222, Australia. E-mail: lei.zhang@griffith.edu.au*

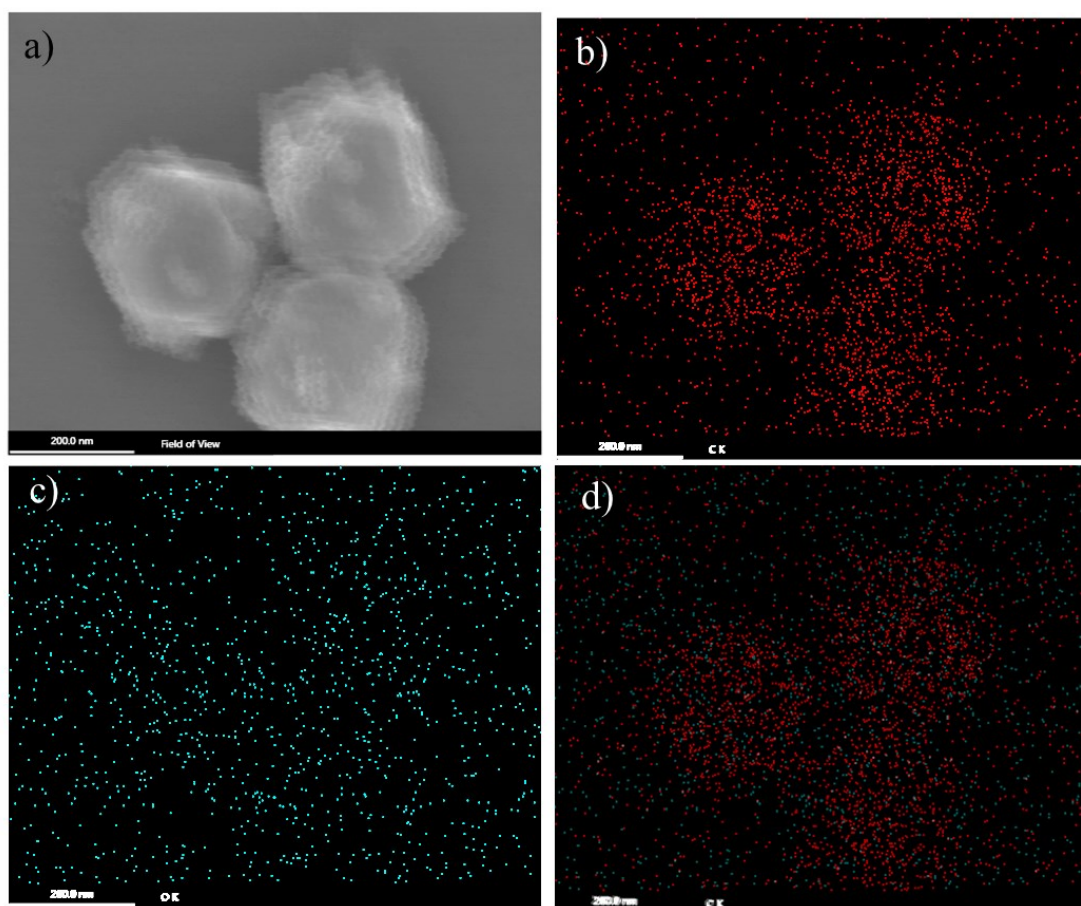

**Fig. S1** EDX elemental mapping images of the P-Cu@C, (a) field of view, (b) Cu, (c) C, (d) overlap image of the Cu and C.

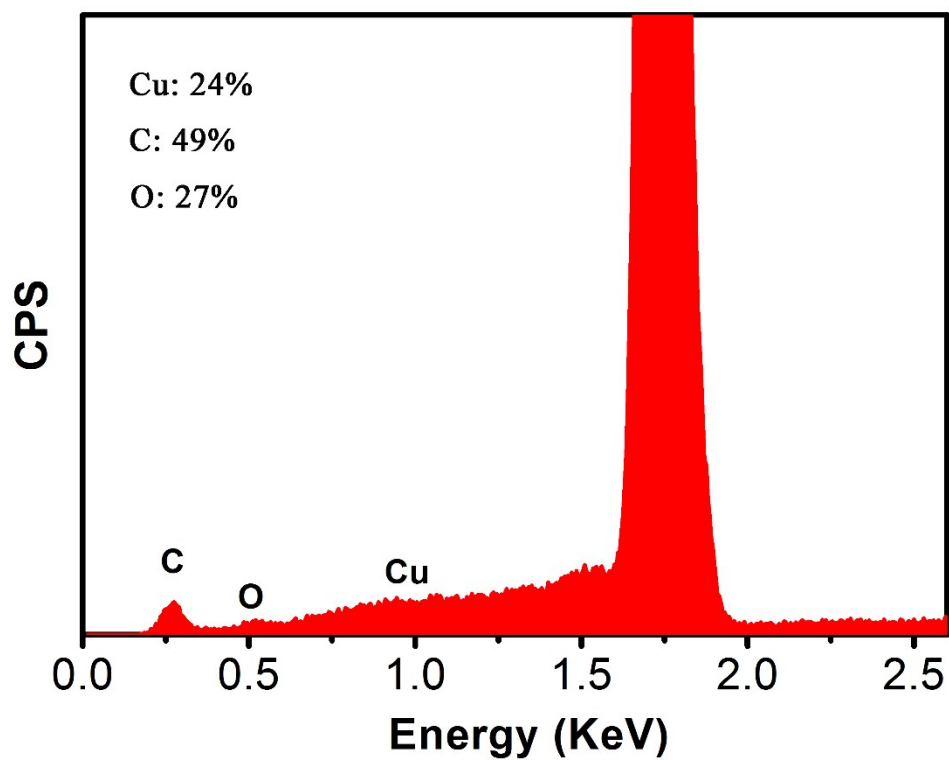

**Fig. S2** EDS plot of the P-Cu@C. The dominated peak at 1.75 KeV is related to the Si, which was used as substrate for the SEM test.

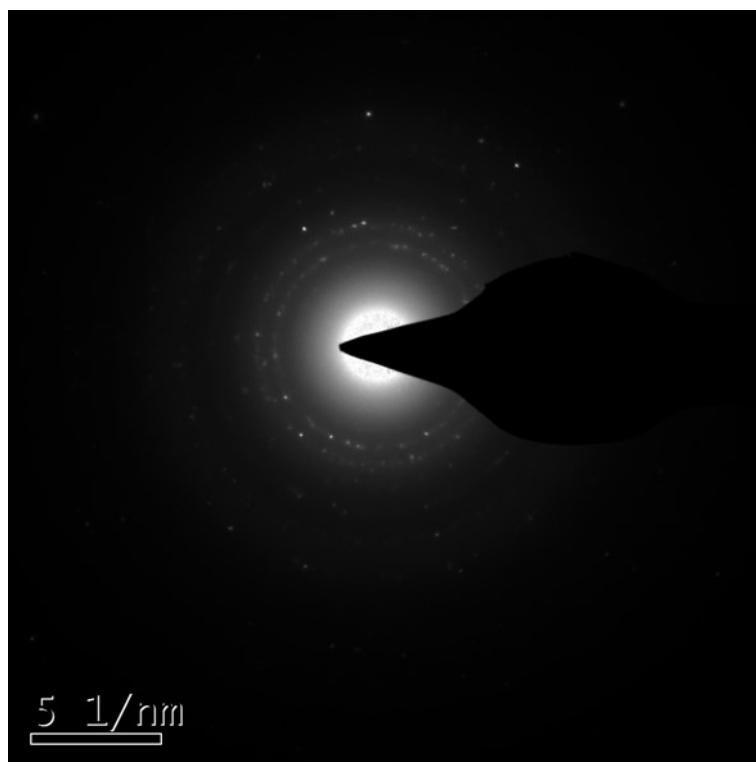

**Fig. S3** SAED images of the P-Cu@C

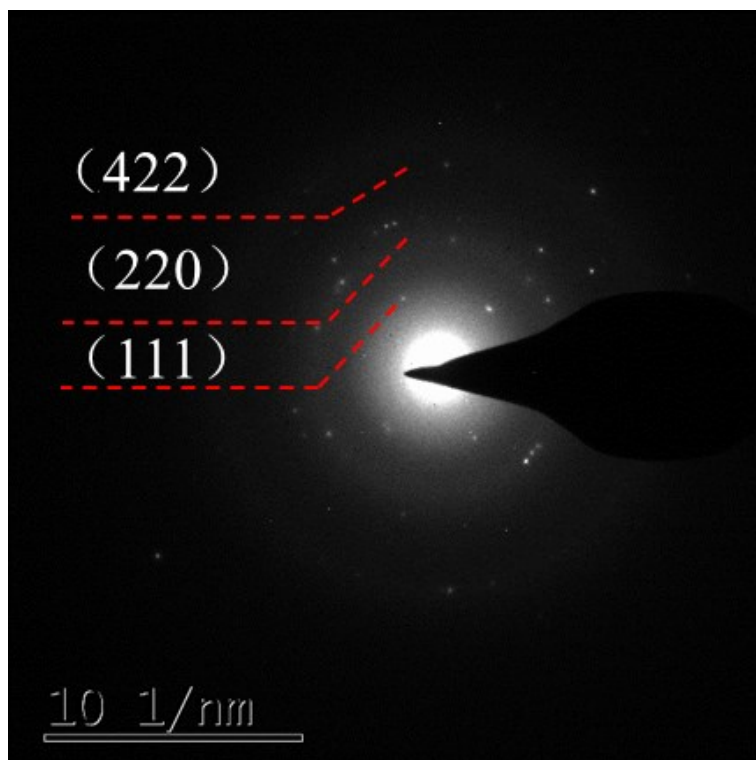

**Fig. S4** SAED images of the AN-Cu<sub>2-x</sub>Se@C

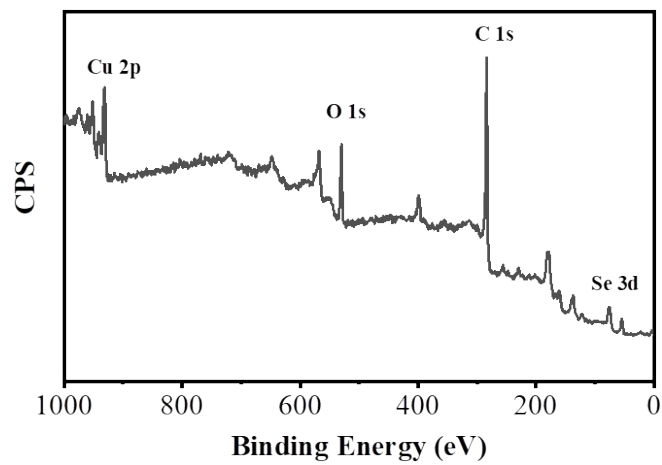

**Fig. S5** XPS survey of the AN-Cu<sub>2-x</sub>Se@C at a lower magnification

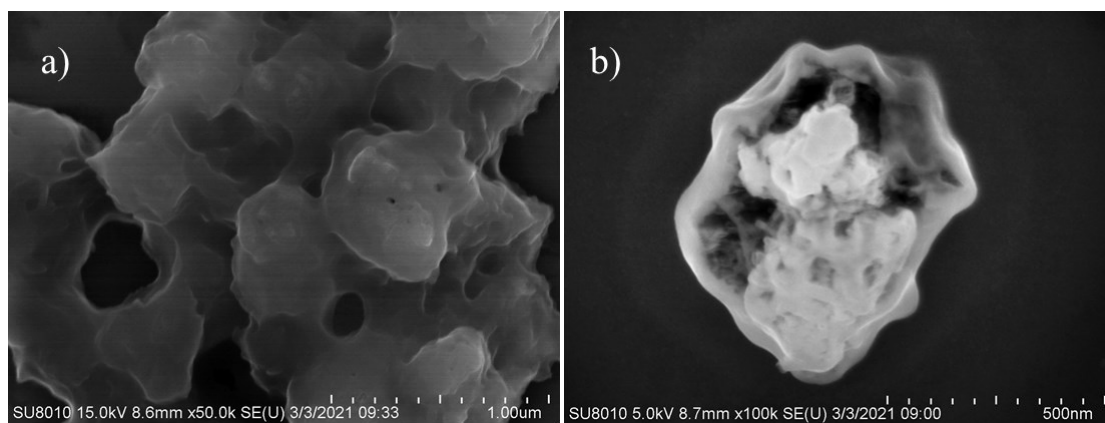

**Fig. S6** SEM images of the after cycled AN-Cu<sub>2-x</sub>Se@C electrode (a) overview, (b) cross-view of an individual AN-Cu<sub>2-x</sub>Se@C particle.

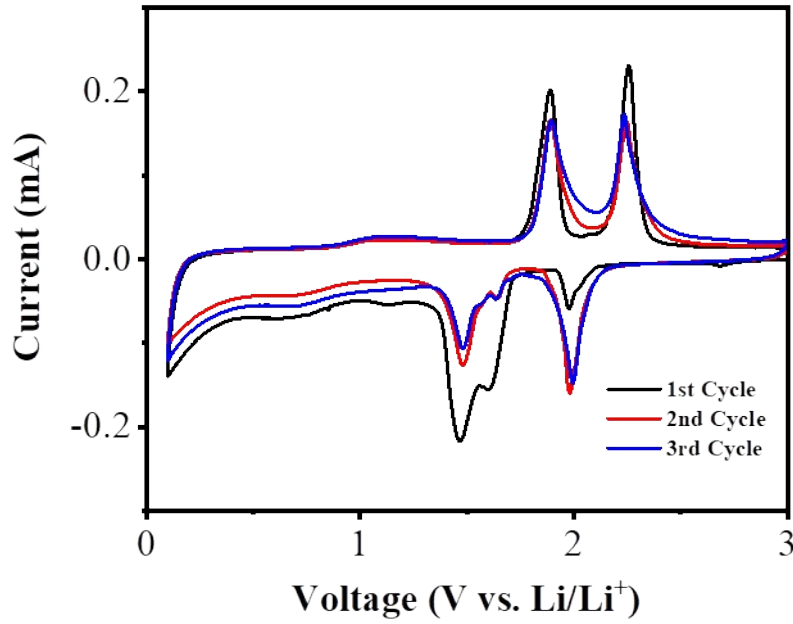

**Fig. S7** CV plots for the AN-Cu<sub>2-x</sub>Se@C at initial cycles at a scan rate of 0.1 mV s<sup>-1</sup>.

During the initial cycles two pair of obvious redox peaks were observed in the CV profiles, indicating a typical stepwise conversion type mechanism. The possible electrochemical reactions can be expressed as follows:

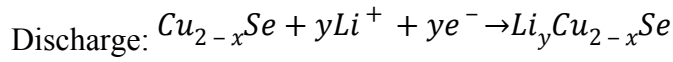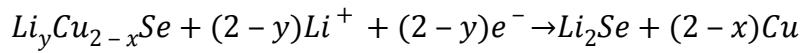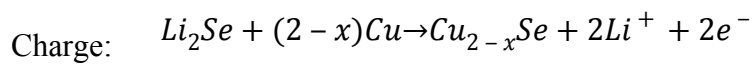

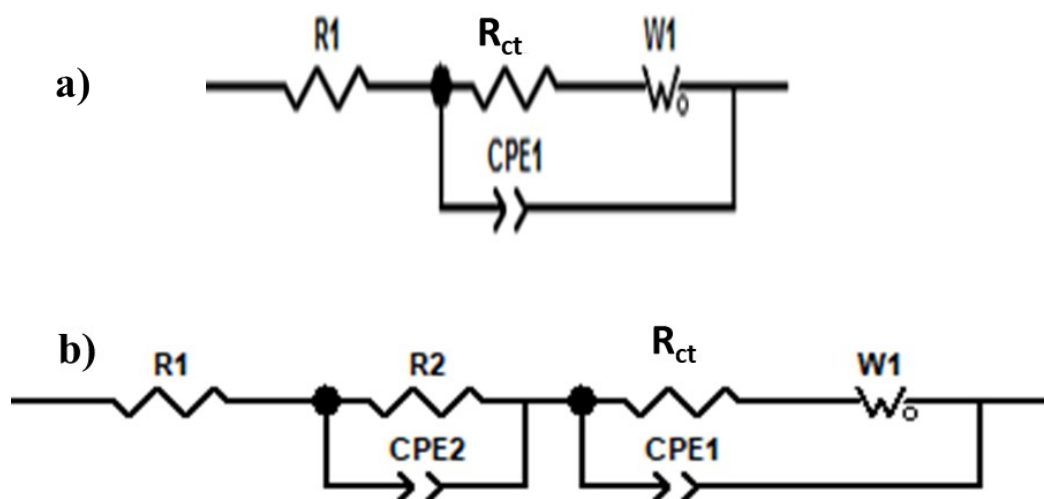

**Fig. S8** Equivalent circuit model for (a) fresh electrode, and (b) electrodes after different cycles

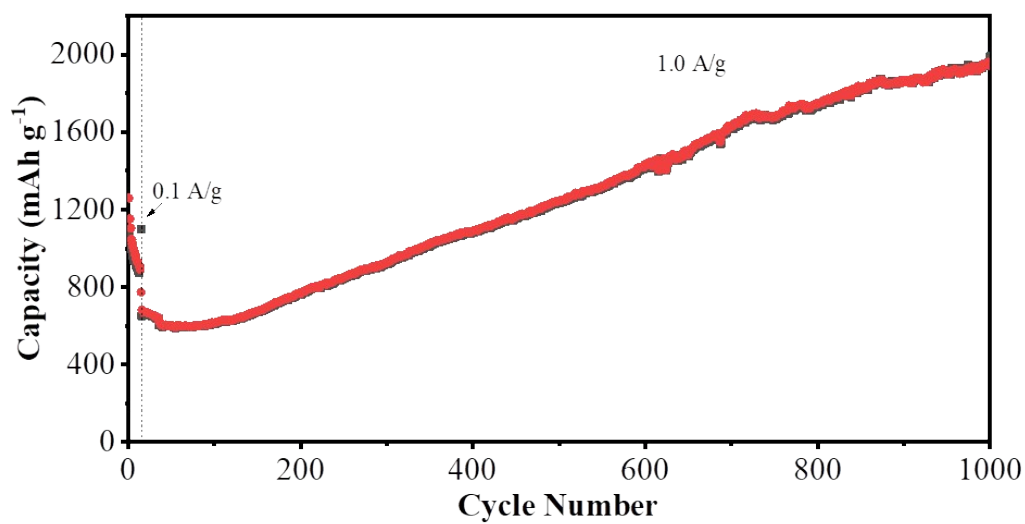

**Fig. S9** Cycling performance of the AN-Cu<sub>2-x</sub>Se@C before rate performance.
